# Supplementary material
Source: publisher site journal article supplement (https://www.dovepress.com/article/231919)
Supplement: Supplementary file 1 [file get_supplementary_file.php]

**Appendix 1.** Other main themes and subthemes revealed by the analysis

| **Theme 2: Patients’ reactions and difficulties** | |
| --- | --- |
| *Emotional reactions*  Patients’ concerns and worries, irritability and anger, as well as emotional distress were mostly reported. Suicidal ideations were also described, but much less frequently. | “It’s mainly the disease’s evolution: where we’re going? What could happen? Yes, it’s mainly what worries me” (Patient 18)  “There was 2-3 months when, honestly, I saw him… very, very depressed” (Relative 21)  “Irritable, that’s it. It’s not… he’s not aggressive you know, he’s not… […] but he’s… the little things will get on his nerves and make him grumble” (Relative 4) |
| *Cognitions*  Patients’ feeling of decline and limitation was mostly reported. People also talked about feeling of acceptance and good management of the disease, some reporting doing as before (the illness). Patients had the feeling of holding back the relative, but some also feared of relatives’ withdraw. Regretting life before illness, and non acceptance were also described. | “I think that for some people, and my husband is one of them, being ill means that you’re diminished” (Relative 2)  “At the moment, it’s more difficult. If I cannot walk or else, it’s… it deprives him a bit. But, hum, he says that’s not a problem for him” (Patient 11)  “And I think that… I think that she sacrificed herself at some point” (Patient 13) |
| *Physical difficulties*  Main physical difficulties were pain and discomfort, movements and handling, travels, and specific difficulties related to the treatment. Some reported fatigue, sexual or intimate problems and other health issues. | “We’re in pain all the time. We’re always in pain, so we live with pain” (Patient 16)  “When we go for a walk, after 5 minutes she wants to go back home, because she’s not feeling well, she’s fed up with it, she’s tired” (Relative 15)  “There was this whole period when she had very high morphine dosage, she could barely do anything” (Relative 13) |
| **Theme 3: Relatives’ reactions and difficulties** | |
| *Emotional reactions*  Relatives’ emotional distress, anger and feeling of injustice, as well as worries and concerns were reported. | “So, on a psychological level, it was hard to accept his disease” (Relative 6)  “Well… I’ll say it’s unfair, because… well… every, every disease is unfair anyway. But… yes, why, why did he caught that?” (Relative 14)  “I don’t feel that it weighs on her, but rather to see me like this” (Patient 19) |
| *Cognitions*  Helplessness, not knowing what/how to do and fear of disease or disability evolution were mainly described. People also reported various thoughts related to fear about: the disease impact on the couple, not being there for the patient, demeaning the patient, becoming ill. Relatives also talked about acceptance. | “There is nothing I can do. Yes. There, you feel helpless. There are times when you feel there is nothing you can do” (Relative 10)  “Well, I think he’s worried for me, that I could become… well, really disabled” (Patient 11) |
| *Attitudes toward the disease*  Relatives were trying to adjust themselves, they had a general helping attitude. While most were trying to get information about the disease, some were avoiding it. | “He is… as he says, he takes things as they come. But… so he coped with it” (Patient 3)  “I think you have to live with it, to accept it too” (Relative 2) |
| *Health*  Relatives had some health issues, they neglected their health, mainly focused on the patient’s health and had sleep problems. | “Well, he is sick as well” (Patient 17)  “I neglected my health, a lot […] I never go see the doctor. But when I do, it really is because it’s become catastrophic” (Relative 17) |
| **Theme 6: Relationships with others (family, friends, etc.)** | |
| Patients and relatives talked about individuals in their environment also living with IA. Some explained that they shared their disease with their family whereas others explained they did not. They also reported misunderstanding related to the invisibility of the disease, as well as social isolation. | “Sadly, we all have the disease in the family, my 3 sisters and me. My little sister suffers a lot from it” (Patient 15)  “It’s a disease you don’t see. I think relatives can imagine that… it’s an act, [patients] aren’t really in pain, or maybe they could do this or that… It’s possible, because you cannot see the disease” (Relative 19) |
| **Theme 7: Activities** | |
| *Type of activities*  People talked about their personal activities, but also about shared activities in the dyad, as well as past and future travels/journeys. Short and long-term projects were also described. | “It’s not that we give up our projects. But, well, you know, we plan things in a very short term” (Relative 5) |
| *Difficulties in having activities*  Obstacles were reported in having diverse activities and planning journeys. Some people talked about the modification or interruption of their professional activity. | “Sometimes my day has to stop a 3 pm. I mean, after that, I cannot do anything. But a day doesn’t last 8 hours but 12 at least. So, it lacks… my participation for 4 hours a day, at least. And that, you have to do with it” (Patient 9) |
| **Theme 8: Disease perception** | |
| Participants talked about illness causes and length. Some patients and relatives perceived the disease as caused by a life event. Several people compared the IA to cancer. Regarding illness duration, people talked about its evolution with peaks and periods of stability. They also reported their experience about treatment evolution, and especially the difficulty to find the appropriate treatment. Some talked about the difficulty to have the right diagnosis, sometimes with a long time of vagrancy. | “In fact, she got the baby in 2003 and shortly after she started having problems. And it was… it was connected” (Relative 9)  “There was 2 phases. The first one was treated quickly, by a rheumatologist close from home. So, with him, everything was ‘pills’. So, I took them for months. After that, he said ‘there it is, you’re healed’ ‘Is it? It’s not a polyarthritis?’ ‘No it’s not ; you don’t have the clinical signs’. If he says so… he’s a doctor, I’m not. So, everything is fine. The disease was eased. However I relapsed 2 years later” (Patient 14)  “And it’s true it’s not… it’s not the same disease, because I always come back to… Compared to a cancer […]” (Relative 14) |
| **Theme 9: Healthcare perception** | |
| *General perception*  Most patients and relatives were globally satisfied with their care, even if they reported they had a lack of information and wrong perception of care services. Patients especially underlined the importance of their relation with health professionals. | “The staff, all the medical staff, nurses, nursing assistants… they’re present, they listen to us” (Patient 17) |
| *Insatisfaction with care*  Some insatisfactions were reported regarding care coordination, past bad intervention experiences and negative attitudes of some health professionals. | “Sometimes, even GPs don’t know what they should do [with this disease]… it’s very complex” (Patient 13)  “And when you find yourself in a hospital, where the sick one is hospitalised… they do him all kind of things and you don’t know anything, even if you try to get the information. And that’s unbearable” (Relative 2) |
| **Theme 10: Help that healthcare professionals can provide** | |
| *Help for the patient*  Main helps dealt with enhancement of quality of life and psychological support. Other elements were: finding a good treatment, training people for having the best gestures and movements, relieving pain, helping the patient to relax, suggesting non-medical treatments/care, and helping the patient to find a normal level of activity again. | “Everyday life, for sure. Bring some relieve on our everyday life, it’s important too” (Relative 11)  “To be able to see a psychologist if… because your pain isn’t just physical after all, it’s also psychological, in your head. And you think about a lot” (Patient 15) |
| *Help for the relative*  Giving the relative information about the disease and its treatment, training the relative to relive the patient and offering psychological support for them, and more globally considering the relative in the patients’ care were reported. | “Actually, I think we need something practical. To be told ‘here what’s gonna happen’” (Relative 13)  “Sometimes I have contractures and I think… if a physical therapist could show my partner how to… well ‘manipulate’ me or, I don’t know, give me some kind of massages…” (Patient 10) |
| *Help for the dyad*  Some patients and relatives explained that health professionals could help them by giving them more information about the disease and its treatments, by helping them to better communicate about the disease or/and by helping they to face the disease. | “Well, I think the basis, at the time of the diagnosis, it would be important to… to tell us where we’re going. That’s what we were saying, we’re left on our own, into the unknown” (Patient 19) |
| **Theme 11: Patients’ therapeutic education** | |
| *Imput of patient education*  Patient education is perceived as an important time for information, for meeting other patients and sharing with them. It might also be reassuring and help downplay ones’ situation. | “Maybe other [participants] will mention something and say ‘oh yeah, it’s the same for me, what we said, it also happens for us’ ” (Relative 20)  “[Participating to TPE] allowed us to see, even my husband, to see… I’m not the only one who feels that” (Patient 7) |
| *Themes to be addressed for relatives*  Suggested themes were: how relative should behave with the patient, which attitudes to have, relations with the patient, communication, relatives well-being and psychological support, as well as information. | “How to manage pain. Hum… what to do, how to respond to someone… what attitude to have when you’re with a person you see suffering, who’s in pain” (Patient 10)  “A theme on how to listen and be there, that would… How to be there without being there” (Relative 4) |
| *Patient education method/conditions*  Preferred modalities were group rather than individual interventions. Also, intervention with patients and relatives together were preferred by relatives, whereas patients said a separate intervention for relatives would be important. | “I think it’s better. It’s more… because people with… in group, they broach subjects you may not have think about” (Relative 20)  “With the patients I think it’s better. I think with the patients it’s better because, well, I think the patients should also hear what relatives can experience” (Patient 13)  “On the other hand, I think interventions just for relatives… it could be interesting, because I think there are things they dare not say in front of the patients” (Patient 13) |
